1 **Photosynthetic induction upon transfer from low to high light is affected by leaf nitrogen**  
2 **content in tomato**

3

4 Hu Sun<sup>1,3</sup>, Yu-Qi Zhang<sup>2</sup>, Shi-Bao Zhang<sup>1</sup>, Wei Huang<sup>1</sup>

5

6 <sup>1</sup> Kunming Institute of Botany, Chinese Academy of Sciences, Kunming, China

7 <sup>2</sup> Institute of Environment and Sustainable Development in Agriculture, Chinese Academy of

8 Agriculture Sciences, Beijing, China

9 <sup>3</sup> University of Chinese Academy of Sciences, Beijing, China

10

11 **Corresponding author:**

12 Wei Huang: huangwei@mail.kib.ac.cn

13

14 **Funding:**

15 1. the National Natural Science Foundation of China (No. 31971412, 32171505).

16 2. the Project for Innovation Team of Yunnan Province.

17

18 **Running head:**

19 Photosynthesis under fluctuating light in tomato

20

21 **Abstract**

22 The response of photosynthetic CO<sub>2</sub> assimilation to changes of illumination affects plant  
23 growth and crop productivity under natural fluctuating light conditions. However, the effects  
24 of nitrogen (N) supply on photosynthetic physiology after transition from low to high light are  
25 seldom studied. To elucidate this, we measured gas exchange and chlorophyll fluorescence  
26 under fluctuating light in tomato (*Solanum lycopersicum*) seedlings grown with different N  
27 conditions. After transition from low to high light, the induction speeds of net CO<sub>2</sub>  
28 assimilation ( $A_N$ ), stomatal conductance ( $g_s$ ) and mesophyll conductance ( $g_m$ ) delayed with the  
29 decline in leaf N content. The times to reach 90% of maximum  $A_N$ ,  $g_s$  and  $g_m$  were negatively  
30 correlated to leaf N content. This delayed photosynthetic induction in plants grown under low  
31 N concentration was mainly caused by the slow induction response of  $g_m$  rather than that of  $g_s$ .  
32 Furthermore, the photosynthetic induction upon transfer from low to high light was hardly  
33 limited by photosynthetic electron flow. These results indicate that decreased leaf N content  
34 declines carbon gain under fluctuating light in tomato. Increasing the induction kinetics of  $g_m$   
35 has the potential to enhance the carbon gain of field crops grown in infertile soil.

36

37 **Keywords:** fluctuating light, nitrogen, photosynthesis, mesophyll conductance,  
38 photosynthetic limitation.

39

## 40 **Introduction**

41 Plants capture light energy to produce chemical energy ATP and NADPH, which are used to  
42 drive nitrogen assimilation and the conversion of CO<sub>2</sub> to sugar. Enhancing net CO<sub>2</sub>  
43 assimilation rate ( $A_N$ ) is thought to be one of the most important targets for improving plant  
44 growth and crop productivity (Yamori *et al.* 2016a; Kromdijk *et al.* 2016; South, Cavanagh,  
45 Liu & Ort 2019). Many previous studies indicated that increasing  $A_N$  under constant high light  
46 can boost plant biomass (Kebeish *et al.* 2007; Timm *et al.* 2012, 2015). Recently, some  
47 studies reported that the response of  $A_N$  to increases of illumination significantly affects the  
48 carbon gain and thus influences plant growth (Slattery, Walker, Weber & Ort 2018; Adachi *et al.*  
49 *et al.* 2019; Kimura, Hashimoto-Sugimoto, Iba, Terashima & Yamori 2020; Yamori, Kusumi, Iba  
50 & Terashima 2020; Zhang, Kaiser, Marcelis, Yang & Li 2020). Therefore, altering the  
51 photosynthetic performance under dynamic illumination is a promising way to improving  
52 photosynthesis under natural fluctuating light (FL) conditions.

53 Plants grown under high nitrogen (N) concentration usually have higher biomass than  
54 plants grown under low N concentration (Makino 2011). An important explanation for this is  
55 that leaf photosynthetic capacity is related to the leaf N content in many higher plants (Yamori,  
56 Nagai & Makino 2011; Li *et al.* 2020), since stromal enzymes and thylakoid proteins account  
57 for the majority of leaf N (Makino & Osmond 1991; Sudo, Makino & Mae 2003; Takashima,  
58 Hikosaka & Hirose 2004). Furthermore, stomatal conductance ( $g_s$ ) and mesophyll  
59 conductance ( $g_m$ ) under constant high light are also increased in plants grown under high N  
60 concentration, which speeds up CO<sub>2</sub> diffusion from atmosphere to chloroplast carboxylation  
61 sites and thus favors the operation of  $A_N$  under constant high light (Yamori *et al.* 2011).  
62 However, little is known about the effects of leaf N content on non-steady-state  
63 photosynthetic performances under FL.

64 Under natural field conditions, light intensity exposed on leaf surface dynamically  
65 changes on timescales from milliseconds to hours (Percy 1990; Slattery *et al.* 2018).  
66 Furthermore, FL and N deficiency usually occurs concomitantly, but how FL and N  
67 deficiency interact to influence photosynthetic physiology in crop plants is poorly understood.  
68 After a sudden transitioning from low to high light, the gradual increase of  $A_N$  is termed

69 “photosynthetic induction”. Recent studies indicated that the induction response of  $A_N$  was  
70 significantly affected by the induction speed of  $g_s$  (De Souza, Wang, Orr, Carmo-Silva &  
71 Long 2020; Kimura *et al.* 2020). Gene expression plays a crucial role in the induction  
72 response of  $g_s$  under FL. For example, the *slow anion channel-associated 1 (slac1)*, *open*  
73 *stomata 1 (ost1)* and abscisic acid deficient *flacca* mutants, and the *proton ATPase*  
74 *translocation control 1 (PATROL1)* overexpression line had faster stomatal opening responses  
75 than WT-types in *Arabidopsis thaliana*, rice and tomato (Kaiser, Morales, Harbinson,  
76 Heuvelink & Marcelis 2020; De Souza *et al.* 2020; Kimura *et al.* 2020; Yamori *et al.* 2020).  
77 Furthermore, the stomatal opening during photosynthetic induction can be affected by  
78 environment conditions such as target light intensity, magnitude of change,  $g_s$  at low light, the  
79 time of day and vapor pressure deficit (Kaiser *et al.* 2020; Sakoda *et al.* 2020; Eyland, van  
80 Wesemael, Lawson & Carpentier 2021). However, there have been few studies that examined  
81 the effect of leaf N content on the induction response of  $g_s$  after transition from low to high  
82 light (Li *et al.* 2020).

83 In addition to  $g_s$ ,  $g_m$  is a major factor affecting  $CO_2$  concentration in chloroplast, because  
84  $g_m$  determines the  $CO_2$  diffusion from intercellular space into the chloroplast (Flexas *et al.*  
85 2013; Carriquí *et al.* 2015). In general,  $g_m$  can be determined by structure across leaf profiles,  
86 genetic types, biochemical components and environmental conditions (Yamori *et al.* 2011;  
87 Xiong *et al.* 2015; Thérooux-Rancourt & Gilbert 2017). Previous studies have highlighted that  
88  $g_m$  is the most important limiting factor for  $A_N$  in many angiosperms (Peguero-Pina *et al.* 2017;  
89 Xiong, Douthe & Flexas 2018; Yang, Huang, Yang, Chang & Zhang 2018b). Short-term  
90 response of  $g_m$  to light intensity has been determined and found that it varies between plant  
91 species (Tazoe, Von Caemmerer, Badger & Evans 2009; Yamori, Evans & Von Caemmerer  
92 2010a; Xiong *et al.* 2018; Yang, Hu & Huang 2020). However, the induction response of  $g_m$   
93 after transition from low to high light is little known. The  $g_m$  level under constant light is also  
94 significantly affected by leaf N content (Yamori *et al.* 2011). Furthermore, the rapid responses  
95 of  $g_m$  to  $CO_2$  concentration and temperature were also affected by leaf N content (Xiong *et al.*  
96 2015). However, no studies have elucidated the effect of leaf N content on induction response  
97 of  $g_m$  upon transfer from low to high light.

98 In this study, we aimed to characterize the effects of leaf N content on induction kinetics  
99 of  $A_N$ ,  $g_s$  and  $g_m$  after a sudden transition from low to high light. Gas exchange and  
100 chlorophyll fluorescence were measured in tomato plants grown under contrasting N  
101 concentrations. The dynamic limitations of  $g_s$ ,  $g_m$  and biochemical factors imposed on  $A_N$   
102 were analyzed based on the biochemical model for C3 photosynthesis (Farquhar, von  
103 Caemmerer & Berry 1980). The effects of leaf N content on photosynthetic performances  
104 during photosynthetic induction were revealed.

105

## 106 **Materials and methods**

### 107 **Plant materials and growth conditions**

108 Tomato (*Solanum lycopersicum* cv. Hupishizi) plants were grown in a greenhouse with the  
109 light condition of 40% full sunlight. The day/night air temperatures were approximately  
110 30/20°C, the relative air humidity was approximately 60%-70%, and the maximum light  
111 intensity exposed to leaves was approximately 800  $\mu\text{mol photons m}^{-2} \text{s}^{-1}$ . Plants were grown  
112 in 19-cm plastic pots with humus soil and the initial soil N content was 2.1 mg/g. Plants were  
113 fertilized with Peters Professional's water solution (N:P:K = 15:4.8:24.1) or water as follows:  
114 high nitrogen (HN, 0.15 g N/plant every two days), middle nitrogen (MN, 0.05 g N/plant once  
115 a week) and low nitrogen (LN, 0 mM N/plant). 0.3% water solution were used for fertilization,  
116 and the nitrogen sources were 24%  $(\text{NH}_4)_3\text{PO}_4$ , 65%  $\text{KNO}_3$  and 9.5%  $\text{CH}_4\text{N}_2\text{O}$ . To prevent  
117 any water stress, these plants were watered every day. After cultivation for one month,  
118 youngest fully developed leaves were used for measurements.

119

### 120 **Gas exchange and chlorophyll fluorescence measurements**

121 An open gas exchange system (LI-6400XT; Li-Cor Biosciences, Lincoln, NE, USA) was used  
122 to simultaneously measure gas exchange and chlorophyll fluorescence. Measurements were  
123 performed at a leaf temperature of approximately 25°C, leaf-to-air vapour pressure deficit of  
124 1.2-1.4 kpa, and flow rate of air through the system of 300  $\mu\text{mol/s}$ . To measure photosynthetic  
125 induction after a short-term shadefleck, leaves were firstly adapted to a light intensity of 1500  
126  $\mu\text{mol photons m}^{-2} \text{s}^{-1}$  and air  $\text{CO}_2$  concentration of 400  $\mu\text{mol mol}^{-1}$  for >20 min until  $A_N$  and

127  $g_s$  reached steady-state. Then, leaves were subjected to 5 min of low light (100  $\mu\text{mol photons}$   
128  $\text{m}^{-2} \text{s}^{-1}$ ) followed by 30 min of high light (1500  $\mu\text{mol photons m}^{-2} \text{s}^{-1}$ ), and gas exchange and  
129 chlorophyll fluorescence were logged every minute.  $i\text{WUE}$  was calculated as  $i\text{WUE} = A_N/g_s$ .  
130 The relative  $A_N$ ,  $g_s$  and  $g_m$  curves were obtained from the standardization against the  
131 maximum values after 30 min photosynthetic induction at high light. The time required to  
132 reach 90% of the maximum  $A_N$ ,  $g_s$  and  $g_m$  was estimated by the first time at which the relative  
133 values were higher than 90%. After photosynthetic induction measurement, the response of  
134  $\text{CO}_2$  assimilation rate to incident intercellular  $\text{CO}_2$  concentration ( $A/C_i$ ) curves were measured  
135 by decreasing the  $\text{CO}_2$  concentration to a lower limit of 50  $\mu\text{mol mol}^{-1}$  and then increasing  
136 stepwise to an upper limit of 1500  $\mu\text{mol mol}^{-1}$ . For each  $\text{CO}_2$  concentration, photosynthetic  
137 measurement was completed in 3 min. Using the  $A/C_i$  curves, the maximum rates of RuBP  
138 regeneration ( $J_{\text{max}}$ ) and carboxylation ( $V_{\text{cmax}}$ ) were calculated (Long & Bernacchi 2003).

139 The quantum yield of PSII photochemistry was calculated as  $\Phi_{\text{PSII}} = (F_m' - F_s)/F_m'$  (Genty,  
140 Briantais & Baker 1989), where  $F_m'$  and  $F_s$  represent the maximum and steady-state  
141 fluorescence after light adaptation, respectively (Baker 2004). The total electron transport rate  
142 through PSII ( $J_{\text{PSII}}$ ) was calculated as follows (Krall & Edwards 1992):

$$J_{\text{PSII}} = \Phi_{\text{PSII}} \times \text{PPFD} \times L_{\text{abs}} \times 0.5$$

143 where PPFD is the photosynthetic photon flux density and leaf absorbance ( $L_{\text{abs}}$ ) is assumed  
144 to be 0.84. We applied the constant of 0.5 based on the assumption that photons were equally  
145 distributed between PSI and PSII.

146

#### 147 **Estimation of mesophyll conductance and chloroplast $\text{CO}_2$ concentration**

148 Mesophyll conductance was calculated according to the following equation (Harley, Loreto,  
149 Di Marco & Sharkey 1992):

$$g_m = \frac{A_N}{C_i - \Gamma^* (J_{\text{PSII}} + 8(A_N + R_d)) / (J_{\text{PSII}} - 4(A_N + R_d))}$$

150 where  $A_N$  represents the net rate of  $\text{CO}_2$  assimilation;  $C_i$  is the intercellular  $\text{CO}_2$  concentration;  
151  $\Gamma^*$  is the  $\text{CO}_2$  compensation point in the absence of daytime respiration (Yamori, Noguchi,  
152 Hikosaka & Terashima 2010b; von Caemmerer & Evans 2015), and we used a typical value  
153 of 40  $\mu\text{mol mol}^{-1}$  in our current study (Xiong *et al.* 2018). Respiration rate in the dark ( $R_d$ )

154 was considered to be half of the dark-adapted mitochondrial respiration rate as measured after  
155 10 min of dark adaptation (Carricú *et al.* 2015).

156 Based on the estimated  $g_m$ , we then calculated the chloroplast CO<sub>2</sub> concentration ( $C_c$ )  
157 according to the following equation (Long & Bernacchi 2003; Warren & Dreyer 2006):

$$C_c = C_i - \frac{A_N}{g_m}$$

158

### 159 **Quantitative limitation analysis of $A_N$**

160 Relative photosynthetic limitations were assessed as follows (Grassi & Magnani 2005):

$$L_s = \frac{g_{\text{tot}}/g_s \times \partial A_N / \partial C_c}{g_{\text{tot}} + \partial A_N / \partial C_c}$$
$$L_{\text{mc}} = \frac{g_{\text{tot}}/g_m \times \partial A_N / \partial C_c}{g_{\text{tot}} + \partial A_N / \partial C_c}$$
$$L_b = \frac{g_{\text{tot}}}{g_{\text{tot}} + \partial A_N / \partial C_c}$$

161 where  $L_s$ ,  $L_{\text{mc}}$ , and  $L_b$  represent the relative limitations of stomatal conductance, mesophyll  
162 conductance, and biochemical capacity, respectively, in setting the observed value of  $A_N$ .  $g_{\text{tot}}$   
163 is the total conductance of CO<sub>2</sub> between the leaf surface and sites of RuBP carboxylation  
164 (calculated as  $1/g_{\text{tot}} = 1/g_s + 1/g_m$ ).

165

### 166 **SPAD index and nitrogen content measurements**

167 A handy chlorophyll meter (SPAD-502 Plus; Minolta, Tokyo, Japan) was used to  
168 non-destructively measure the SPAD index (relative content of chlorophyll per unit leaf area)  
169 of leaves used for photosynthetic measurements. Thereafter, leaf area was measured using a  
170 LI-3000A portable leaf area meter (Li-Cor, Lincoln, NE, USA). After leaf material was dried  
171 at 80°C for 48 hours, dry weight was measured and leaf N content was determined with a  
172 Vario MICRO Cube Elemental Analyzer (Elementar Analysensysteme GmbH, Langenselbold,  
173 Germany) (Sakowska *et al.* 2018).

174

## 175 **Results**

### 176 **Effect of leaf N content on steady-state physiological characteristics under high light**

177 The leaf N content in LN-, MN- and HN-plants were  $0.42 \pm 0.03$ ,  $0.71 \pm 0.3$  and  $1.2 \pm 0.07$  g

178  $\text{m}^{-2}$ , respectively (Table 1). The HN-plants displayed the highest relative chlorophyll content,  
179 measured by SPAD value, followed by MN- and LN-plants. After 30 min light adaptation at  
180  $1500 \mu\text{mol photons m}^{-2} \text{s}^{-1}$  and  $400 \mu\text{mol mol}^{-1} \text{CO}_2$  concentration, HN-plants had the highest  
181 net  $\text{CO}_2$  assimilation rate ( $A_N$ ), stomatal conductance ( $g_s$ ), mesophyll conductance ( $g_m$ ) and  
182 electron transport rate (ETR). Therefore, the steady-state photosynthetic capacities were  
183 significantly affected by leaf N content. Furthermore, HN-, MN- and LN-plants showed slight  
184 difference in  $g_s$  but significant difference in  $g_m$ , indicating that  $g_m$  is more responsive to leaf N  
185 content than  $g_s$  in tomato.

186

### 187 **Effects of leaf N content on photosynthetic induction upon transfer from low to high** 188 **light**

189 During this photosynthetic induction after 5 min of shade-fleck, HN-plants showed the highest  
190 induction speeds of  $A_N$ ,  $g_s$  and  $g_m$ , followed by MN- and LN-plants (Fig. 1). The time required  
191 to reach 90% of the maximum  $A_N$  ( $t_{90AN}$ ) significantly increased with the decrease in leaf N  
192 content (Fig. 1G). The time required to reach 90% of the maximum  $g_s$  and  $g_m$  ( $t_{90gs}$  and  $t_{90gm}$ ,  
193 respectively) were significantly shorter in HN-plants than MN- and LN-plants, whereas  $t_{90gs}$   
194 and  $t_{90gm}$  did not differ significantly between MN- and LN-plants (Fig. 1G). Interestingly,  $t_{90gm}$   
195 was lower than  $t_{90gs}$  in all plants. The higher  $t_{90gs}$  and  $t_{90AN}$  in MN- and LN-plants was partially  
196 related to the relatively lower initial  $g_s$  prior to light change (Fig. S1). Within the first 15  
197 minutes after transition from low to high light, all plants showed similar intrinsic water use  
198 efficiency (iWUE) (Fig. S2). However, during prolonged photosynthetic induction, HN-plants  
199 displayed much higher iWUE than MN- and LN-plants (Fig. S2). Further analysis found that  
200 leaf N content was negatively correlated to  $t_{90AN}$ ,  $t_{90gs}$  and  $t_{90gm}$  (Fig. 2). Therefore, leaf N  
201 content plays a crucial role in affecting the induction responses of  $A_N$ ,  $g_s$  and  $g_m$  after  
202 transition from low to high light. The comparative extent of the reductions of  $t_{90AN}$  was more  
203 correlated to  $t_{90gm}$  than  $t_{90gs}$  (Fig. 3A). Furthermore, the change in  $A_N$  during photosynthetic  
204 induction was more related to  $g_m$  than  $g_s$  (Fig. 3B&C). These results suggest that, upon  
205 transfer from low to high light,  $g_m$  plays a more important role in determining the induction  
206 response of  $A_N$  than  $g_s$ .



207

208 **Effects of leaf N content on intercellular and chloroplast CO<sub>2</sub> concentrations upon**  
209 **transfer from low to high light**

210 We calculated the response kinetics of intercellular ( $C_i$ ) and chloroplast CO<sub>2</sub> concentration ( $C_c$ )  
211 using  $A_N$ ,  $g_s$  and  $g_m$ . After transitioning from low to high light,  $C_i$  and  $C_c$  gradually increased  
212 in all plants (Fig. 4). HN-plants had the lowest values of  $C_i$  and  $C_c$  after photosynthetic  
213 sufficient photosynthetic induction. The change in  $A_N$  during photosynthetic induction was  
214 tightly and positively correlated to  $C_c$  in all plants, suggesting the importance of  $C_c$  in  
215 determining  $A_N$ . Because  $C_c$  can be affected by  $g_s$  and  $g_m$ , we analyzed the relationships  
216 between  $C_c$ ,  $g_s$  and  $g_m$ . Compared with  $g_s$ , a smaller change in  $g_m$  could result in a larger  
217 change in  $C_c$  (Fig. 5), suggesting that the change of  $C_c$  upon transfer from low to high light  
218 was more determined by  $g_m$  than  $g_s$ .

219

220 **Effects of leaf N content on relative limitations of photosynthesis upon transfer from low**  
221 **to high light**

222 After transition from low to high light, the limitations of photosynthesis by  $g_s$  ( $L_{gs}$ ),  $g_m$  ( $L_{gm}$ )  
223 and biochemical factors ( $L_b$ ) changed slightly in HN-plants (Fig. 6). In MN- and LN-plants,  
224  $L_{gs}$  gradually decreased over time. Within the first 15 min,  $L_{gs}$  was lower in HN-plants than  
225 MN- and LN-plants. However, the LN-plants had the lowest  $L_{gs}$  after sufficient photosynthetic  
226 induction.  $L_{gm}$  was also maintained stable during whole photosynthetic induction in MN- and  
227 LN-plants, but  $L_b$  gradually increased from 0.3 to 0.5 in them. Therefore, leaf N content could  
228 affect the kinetics of relative limitations of photosynthesis during photosynthetic induction  
229 after transfer from low to high light. To explore whether the induction of  $A_N$  is limited by  
230 photosynthetic electron transport, we estimated the dynamic change of electron transport rate  
231 (ETR). Upon a sudden increase in illumination, ETR rapidly increased and the ETR/( $A_N + R_d$ )  
232 ratio first increased and then gradually decreased in all plants (Fig. 7). These results indicated  
233 that the activation speed of ETR was much faster than that of  $A_N$ . Therefore, during  
234 photosynthetic induction the limitation of ETR imposed to  $A_N$  was negligible in all samples.

235

## 236 **Discussion**

237 Leaf N content plays an important role in determining photosynthesis, plant growth and crop  
238 productivity (Makino 2011). Under natural field conditions, FL and N deficiency usually  
239 occurs concomitantly. However, it is unknown how FL and N deficiency interact to influence  
240 photosynthetic physiology in crop plants. In this study, we here for the first time examined the  
241 effects of leaf N content on photosynthetic induction after transition from low to high light in  
242 tomato. We found that leaf N content significantly affected the induction responses of  $g_s$  and  
243  $g_m$  and thus affected induction kinetics of  $A_N$ . However, the activation speed of photosynthetic  
244 electron flow was not influenced by leaf N content. Therefore, the effect of leaf N content on  
245 photosynthetic induction was more attributed to the induction kinetics of diffusional  
246 conductance rather than the activation speed of electron transport.

247 In addition to steady-state photosynthetic capacity under high light, the photosynthetic  
248 responses to the changes in illumination significantly affect the carbon gain and plant biomass  
249 (Adachi *et al.* 2019; Kimura *et al.* 2020; Zhang *et al.* 2020). Many previous studies have  
250 documented that leaf N content influences the steady-state photosynthetic performances under  
251 high light (Evans & Terashima 1988; Makino & Osmond 1991), but little is known about the  
252 influence of leaf N content on photosynthetic induction under FL conditions. Similar to  
253 previous studies, the maximum steady-state  $A_N$  under high light significantly declined with  
254 the decrease in leaf N content (Table 1). Moreover, we here found that, after transition from  
255 low to high light, the HN-plants showed much faster induction response of  $A_N$  than MN- and  
256 LN-plants (Fig. 1). The time required to reach 90% of the steady-state of photosynthesis ( $t_{90AN}$ )  
257 was negatively correlated to leaf N content (Fig. 2). Therefore, leaf N content significantly  
258 affect the photosynthetic induction after transition from low to high light in tomato. This  
259 finding is similar to the photosynthetic induction of dark-adapted leaves among canola  
260 genotypes (*Brassica napus* L.) (Liu, Zhang, Estavillo, Luo & Hu 2021), but was inconsistent  
261 with the phenomenon in soybean (Li *et al.* 2020). In soybean, the induction rate of  $A_N$  under  
262 high light after shading for 5 min was very fast (Percy, Krall & Sassenrath-Cole 1996; Li *et al.*  
263 *et al.* 2020). Furthermore, this fast photosynthetic induction in soybean was not affected by leaf  
264 N content (Li *et al.* 2020). Therefore, the effect of leaf N content on fast photosynthetic

265 induction following shade-fleck depends on the species and on growth conditions. In MN- and  
266 LN-plants of tomato, the delayed induction of  $A_N$  caused a larger loss of carbon gain under FL.  
267 This finding provides insight into why plants grown under low N concentrations display  
268 reduction of plant biomass under natural field FL conditions.

269 After transition from low to high light, the time to reach the maximum  $C_c$  was less in  
270 HN-plants than MN- and LN-plants (Fig. 4). Furthermore, tight and positive relationships  
271 were found between  $C_c$  and  $A_N$  in all plants (Fig. 4). These results suggested that the induction  
272 response of  $A_N$  was largely determined by the change of  $CO_2$  concentration in the site of  
273 RuBP carboxylation. The value of  $C_c$  in a given leaf is largely affected by  $CO_2$  diffusional  
274 conductance, including  $g_s$  and  $g_m$  (Sagardoy *et al.* 2010; Carriquí *et al.* 2015; Yang *et al.*  
275 2018b). However, it is unclear whether the photosynthetic induction of  $A_N$  upon transfer from  
276 low to high light is more determined by the induction response of  $g_s$  or  $g_m$ . We found that the  
277 induction responses of  $g_s$  and  $g_m$  were largely delayed in MN- and LN-plants than HN-plants  
278 (Fig. 1), and the induction rates of  $g_s$  and  $g_m$  were negatively correlated to leaf N content (Fig.  
279 2). Furthermore, the change of  $C_c$  during photosynthetic induction was more related to  $g_m$   
280 rather than  $g_s$  (Fig. 5), pointing out the important role of  $g_m$  response in determining  $C_c$  upon  
281 transfer from low to high light. Therefore, the delayed photosynthetic induction of  $A_N$  in  
282 plants grown under low N concentrations was more attributed to the slower induction  
283 response of  $g_m$  than  $g_s$ .

284 In HN-plants of tomato, photosynthetic limitations by  $g_s$ ,  $g_m$  and biochemical factors  
285 changed slightly upon transfer from low to high light. Meanwhile,  $g_s$  imposed the smallest  
286 limitation to  $A_N$ , owing to the high levels of  $g_s$  (Fig. 6). Therefore, improving the induction  
287 response of  $g_s$  might have a minor factor for improving photosynthesis under FL in HN-plants  
288 of tomato under optimal conditions (Kaiser *et al.* 2020). By comparison, increased  $g_s$  has a  
289 significant effect on photosynthetic  $CO_2$  assimilation under FL in *Arabidopsis thaliana* and  
290 rice (Kimura *et al.* 2020; Yamori *et al.* 2020). These results indicate that the effects of altered  
291  $g_s$  kinetics on photosynthesis under FL is species dependent. In MN- and LN-plants, the  
292 relatively slower kinetics of  $g_s$  led to a higher  $L_{gs}$  of  $A_N$  during the initial 15 min after  
293 transition from low to high light (Fig. 6). Therefore, altered  $g_s$  kinetics would have more

294 significant effects on photosynthetic carbon gain in crop plants grown under low N  
295 concentrations.

296 Many previous studies have indicated that  $g_m$  act as a major limitation for steady-state  $A_N$   
297 under high light in many angiosperms (Peguero-Pina *et al.* 2017; Th eroux-Rancourt & Gilbert  
298 2017; Yang, Tong, Yu, Zhang & Huang 2018a; Huang, Yang, Wang & Hu 2019). Increasing  
299  $g_m$  has been thought to be a potential target for improving crop productivity and water use  
300 efficiency under constant high light (Flexas *et al.* 2013; Gago *et al.* 2016). However, the  
301 limitation of  $g_m$  imposed to  $A_N$  under FL is poorly understood. Upon transition from dark to  
302 light, the induction response of  $g_m$  was much faster than that of  $g_s$ , leading to the smallest  
303 limitation of  $g_m$  imposed to  $A_N$  in *Arabidopsis thaliana* and tobacco (Sakoda, Yamori,  
304 Groszmann & Evans 2021). Consequently, one concluded that altering  $g_m$  kinetics would have  
305 little impact on  $A_N$  under FL. However, we found that, after transfer from low to high light,  
306  $L_{gm}$  was higher than  $L_{gs}$  in tomato plants (Fig. 6). Furthermore, the time to reach 90% of  $A_N$   
307 was closer to that of  $g_m$  rather than that of  $g_s$  (Fig. 3). Therefore, altering  $g_m$  kinetics would  
308 significantly influence  $A_N$  upon transfer from low to high light, at least in tomato. These  
309 results suggested that the photosynthetic limitation upon transfer from low to high light was  
310 largely different from the photosynthetic induction during illumination of dark-adapted leaves.  
311 Improving the induction rate of  $g_m$  has a potential to enhance carbon gain and plant biomass  
312 under natural FL conditions.

313 A recent study reported that, if RuBP regeneration limitation was assumed, electron  
314 transport imposed the greatest limitation to  $A_N$  during illumination of dark-adapted leaves  
315 (Sakoda *et al.* 2021). Based on this result, it is hypothesized that increased activation of  
316 electron transport has the potential to enhance carbon gain under naturally FL environments.  
317 Controversially, our present study indicated that electron transport was rapidly activated upon  
318 transfer from low to high light. After transition from low to high light, the  $ETR/(A_N + R_d)$   
319 value rapidly increased to the peak within 1-2 min and then gradually decreased over time  
320 (Fig. 7). These results indicated that, upon transfer from low to high light, the induction  
321 response of electron transport was much faster than that of  $A_N$ , which was consistent to the  
322 photosynthetic performance in rice (Yamori, Makino & Shikanai 2016b). Therefore, induction

323 response of  $A_N$  after transition from low to high light was hardly limited by electron transport  
324 in tomato. The effect of electron transport on  $A_N$  upon transition from low to high light is  
325 largely different from that upon transition from dark to light. Therefore, to improve  
326 photosynthesis under FL in tomato, more attention should be focused on the induction  
327 kinetics of  $CO_2$  diffusional conductance rather than the activation of electron transport.

328

### 329 **Conclusions**

330 We studied the effects of leaf N content on photosynthetic induction after transfer from low to  
331 high light in tomato. The induction speeds of  $A_N$ ,  $g_s$  and  $g_m$  significantly decreased with the  
332 decrease in leaf N content. Such delayed photosynthetic induction in plants grown under low  
333 N concentration caused a larger loss of carbon gain under FL conditions, which further  
334 explained why N deficiency reduced plant biomass under natural FL environments. After  
335 transition from low to high light, increasing the induction responses of  $g_s$  and  $g_m$  has the  
336 potential to improve  $A_N$  in tomato, especially when plants are grown under low N  
337 concentration, whereas photosynthetic induction of  $A_N$  was hardly limited by electron  
338 transport. Therefore, altering induction kinetics of  $CO_2$  diffusional conductance is likely the  
339 most effective target for improving photosynthesis under FL conditions in tomato.

340

### 341 **Acknowledgments**

342 This work was supported by the National Natural Science Foundation of China (No.  
343 31971412, 32171505), and the Project for Innovation Team of Yunnan Province.

344

### 345 **References**

- 346 Adachi S., Tanaka Y., Miyagi A., Kashima M., Tezuka A., Toya Y., ... Yamori W. (2019)  
347 High-yielding rice Takanari has superior photosynthetic response to a commercial rice  
348 Koshihikari under fluctuating light. *Journal of Experimental Botany* **70**, 5287–5297.
- 349 Baker N.R. (2004) Applications of chlorophyll fluorescence can improve crop production  
350 strategies: an examination of future possibilities. *Journal of Experimental Botany* **55**,  
351 1607–1621.

- 352 von Caemmerer S. & Evans J.R. (2015) Temperature responses of mesophyll conductance  
353 differ greatly between species. *Plant, Cell and Environment* **38**, 629–637.
- 354 Carriqui M., Cabrera H.M., Conesa M., Coopman R.E., Douthe C., Gago J., ... Flexas J.  
355 (2015) Diffusional limitations explain the lower photosynthetic capacity of ferns as  
356 compared with angiosperms in a common garden study. *Plant, Cell and Environment* **38**,  
357 448–460.
- 358 Evans J.R. & Terashima I. (1988) Photosynthetic characteristics of spinach leaves grown with  
359 different nitrogen treatments. *Plant and Cell Physiology* **29**, 157–165.
- 360 Eyland D., van Wesemael J., Lawson T. & Carpentier S. (2021) The impact of slow stomatal  
361 kinetics on photosynthesis and water use efficiency under fluctuating light. *Plant*  
362 *Physiology* **186**, 998–1012.
- 363 Farquhar G.D., von Caemmerer S. & Berry J.A. (1980) A biochemical model of  
364 photosynthetic CO<sub>2</sub> assimilation in leaves of C<sub>3</sub> species. *Planta* **149**, 78–90.
- 365 Flexas J., Niinemets Ü., Gallé A., Barbour M.M., Centritto M., Diaz-Espejo A., ... Medrano  
366 H. (2013) Diffusional conductances to CO<sub>2</sub> as a target for increasing photosynthesis and  
367 photosynthetic water-use efficiency. *Photosynthesis Research* **117**, 45–59.
- 368 Gago J., Daloso D. de M., Figueroa C.M., Flexas J., Fernie A.R. & Nikoloski Z. (2016)  
369 Relationships of Leaf Net Photosynthesis, Stomatal Conductance, and Mesophyll  
370 Conductance to Primary Metabolism: A Multispecies Meta-Analysis Approach. *Plant*  
371 *Physiology* **171**, 265–279.
- 372 Genty B., Briantais J.-M. & Baker N.R. (1989) The relationship between the quantum yield of  
373 photosynthetic electron transport and quenching of chlorophyll fluorescence. *Biochimica*  
374 *et Biophysica Acta (BBA) - General Subjects* **990**, 87–92.
- 375 Grassi G. & Magnani F. (2005) Stomatal, mesophyll conductance and biochemical limitations  
376 to photosynthesis as affected by drought and leaf ontogeny in ash and oak trees. *Plant,*  
377 *Cell and Environment* **28**, 834–849.
- 378 Harley P.C., Loreto F., Di Marco G. & Sharkey T.D. (1992) Theoretical considerations when  
379 estimating the mesophyll conductance to CO<sub>2</sub> flux by analysis of the response of  
380 photosynthesis to CO<sub>2</sub>. *Plant Physiology* **98**, 1429–1436.

- 381 Huang W., Yang Y.-J., Wang J.-H. & Hu H. (2019) Photorespiration is the major alternative  
382 electron sink under high light in alpine evergreen sclerophyllous *Rhododendron* species.  
383 *Plant Science*, 110275.
- 384 Kaiser E., Morales A., Harbinson J., Heuvelink E. & Marcelis L.F.M. (2020) High Stomatal  
385 Conductance in the Tomato Flacca Mutant Allows for Faster Photosynthetic Induction.  
386 *Frontiers in Plant Science* **11**, 1–12.
- 387 Kebeish R., Niessen M., Thiruveedhi K., Bari R., Hirsch H.-J., Rosenkranz R., ... Peterhänsel  
388 C. (2007) Chloroplastic photorespiratory bypass increases photosynthesis and biomass  
389 production in *Arabidopsis thaliana*. *Nature biotechnology* **25**, 593–599.
- 390 Kimura H., Hashimoto-Sugimoto M., Iba K., Terashima I. & Yamori W. (2020) Improved  
391 stomatal opening enhances photosynthetic rate and biomass production in fluctuating  
392 light. *Journal of Experimental Botany* **71**, 2339–2350.
- 393 Krall J.P. & Edwards G.E. (1992) Relationship between photosystem II activity and CO<sub>2</sub>  
394 fixation in leaves. *Physiologia Plantarum* **86**, 180–187.
- 395 Kromdijk J., Glowacka K., Leonelli L., Gabilly S.T., Iwai M., Niyogi K.K. & Long S.P.  
396 (2016) Improving photosynthesis and crop productivity by accelerating recovery from  
397 photoprotection. *Science* **354**, 857–861.
- 398 Li Y.-T., Li Y., Li Y.-N., Liang Y., Sun Q., Li G., ... Gao H.-Y. (2020) Dynamic light caused  
399 less photosynthetic suppression, rather than more, under nitrogen deficit conditions than  
400 under sufficient nitrogen supply conditions in soybean. *BMC Plant Biology* **20**, 339.
- 401 Liu J., Zhang J., Estavillo G.M., Luo T. & Hu L. (2021) Leaf N content regulates the speed of  
402 photosynthetic induction under fluctuating light among canola genotypes (*Brassica*  
403 *napus* L.). *Physiologia Plantarum* **172**, 1844–1852.
- 404 Long S.P. & Bernacchi C.J. (2003) Gas exchange measurements, what can they tell us about  
405 the underlying limitations to photosynthesis? Procedures and sources of error. *Journal of*  
406 *Experimental Botany* **54**, 2393–2401.
- 407 Makino A. (2011) Photosynthesis, Grain Yield, and Nitrogen Utilization in Rice and Wheat.  
408 *Plant Physiology* **155**, 125–129.
- 409 Makino A. & Osmond B. (1991) Effects of nitrogen nutrition on nitrogen partitioning

- 410 between chloroplasts and mitochondria in pea and wheat. *Plant Physiology* **96**, 355–362.
- 411 Percy R.W. (1990) Sunflecks and photosynthesis in plant canopies. *Annual Review of Plant*  
412 *Physiology and Plant Molecular Biology* **41**, 421–453.
- 413 Percy R.W., Krall J.P. & Sassenrath-Cole G.F. (1996) Photosynthesis in Fluctuating Light  
414 Environments. In *Photosynthesis and the Environment*. pp. 321–346. Kluwer Academic  
415 Publishers, Dordrecht.
- 416 Peguero-Pina J.J., Sisó S., Flexas J., Galmés J., García-Nogales A., Niinemets Ü., ...  
417 Gil-Pelegrín E. (2017) Cell-level anatomical characteristics explain high mesophyll  
418 conductance and photosynthetic capacity in sclerophyllous Mediterranean oaks. *New*  
419 *Phytologist* **214**, 585–596.
- 420 Sagardoy R., Vázquez S., Florez-Sarasa I.D., Albacete A., Ribas-Carbó M., Flexas J., ...  
421 Morales F. (2010) Stomatal and mesophyll conductances to CO<sub>2</sub> are the main  
422 limitations to photosynthesis in sugar beet (*Beta vulgaris*) plants grown with excess zinc.  
423 *New Phytologist* **187**, 145–158.
- 424 Sakoda K., Yamori W., Groszmann M. & Evans J.R. (2021) Stomatal , mesophyll  
425 conductance , and biochemical limitations to photosynthesis during induction Research  
426 Article. 146–160.
- 427 Sakoda K., Yamori W., Shimada T., Sugano S.S., Hara-Nishimura I. & Tanaka Y. (2020)  
428 Higher stomatal density improves photosynthetic induction and biomass production in  
429 *Arabidopsis* under fluctuating light. *Frontiers in Plant Science* **11**, 1308.
- 430 Sakowska K., Alberti G., Genesisio L., Peressotti A., Delle Vedove G., Gianelle D., ...  
431 Miglietta F. (2018) Leaf and canopy photosynthesis of a chlorophyll deficient soybean  
432 mutant. *Plant, Cell & Environment* **41**, 1427–1437.
- 433 Slattery R.A., Walker B.J., Weber A.P.M. & Ort D.R. (2018) The impacts of fluctuating light  
434 on crop performance. *Plant Physiology* **176**, 990–1003.
- 435 South P.F., Cavanagh A.P., Liu H.W. & Ort D.R. (2019) Synthetic glycolate metabolism  
436 pathways stimulate crop growth and productivity in the field. *Science* **363**, eaat9077.
- 437 De Souza A.P., Wang Y., Orr D.J., Carmo □ Silva E. & Long S.P. (2020) Photosynthesis  
438 across African cassava germplasm is limited by Rubisco and mesophyll conductance at



- 439 steady state, but by stomatal conductance in fluctuating light. *New Phytologist* **225**,  
440 2498–2512.
- 441 Sudo E., Makino A. & Mae T. (2003) Differences between rice and wheat in  
442 ribulose-1,5-bisphosphate regeneration capacity per unit of leaf-N content. *Plant, Cell*  
443 *and Environment* **26**, 255–263.
- 444 Takashima T., Hikosaka K. & Hirose T. (2004) Photosynthesis or persistence: Nitrogen  
445 allocation in leaves of evergreen and deciduous *Quercus* species. *Plant, Cell and*  
446 *Environment* **27**, 1047–1054.
- 447 Tazoe Y., Von Caemmerer S., Badger M.R. & Evans J.R. (2009) Light and CO<sub>2</sub> do not affect  
448 the mesophyll conductance to CO<sub>2</sub> diffusion in wheat leaves. *Journal of Experimental*  
449 *Botany* **60**, 2291–2301.
- 450 Th eroux-Rancourt G. & Gilbert M.E. (2017) The light response of mesophyll conductance is  
451 controlled by structure across leaf profiles. *Plant Cell and Environment* **40**, 726–740.
- 452 Timm S., Florian A., Arrivault S., Stitt M., Fernie A.R. & Bauwe H. (2012) Glycine  
453 decarboxylase controls photosynthesis and plant growth. *FEBS Letters* **586**, 3692–3697.
- 454 Timm S., Wittmi  M., Gamlien S., Ewald R., Florian A., Frank M., ... Bauwe H. (2015)  
455 Mitochondrial dihydrolipoyl dehydrogenase activity shapes photosynthesis and  
456 photorespiration of *Arabidopsis thaliana*. *The Plant Cell* **27**, 1968–1984.
- 457 Warren C.R. & Dreyer E. (2006) Temperature response of photosynthesis and internal  
458 conductance to CO<sub>2</sub>: Results from two independent approaches. *Journal of*  
459 *Experimental Botany* **57**, 3057–3067.
- 460 Xiong D., Douthe C. & Flexas J. (2018) Differential coordination of stomatal conductance,  
461 mesophyll conductance, and leaf hydraulic conductance in response to changing light  
462 across species. *Plant, Cell & Environment* **41**, 436–450.
- 463 Xiong D., Liu X., Liu L., Douthe C., Li Y., Peng S. & Huang J. (2015) Rapid responses of  
464 mesophyll conductance to changes of CO<sub>2</sub> concentration, temperature and irradiance are  
465 affected by N supplements in rice. *Plant, Cell and Environment* **38**, 2541–2550.
- 466 Yamori W., Evans J.R. & Von Caemmerer S. (2010a) Effects of growth and measurement  
467 light intensities on temperature dependence of CO<sub>2</sub> assimilation rate in tobacco leaves.

- 468 *Plant, Cell and Environment* **33**, 332–343.
- 469 Yamori W., Kondo E., Sugiura D., Terashima I., Suzuki Y. & Makino A. (2016a) Enhanced  
470 leaf photosynthesis as a target to increase grain yield: Insights from transgenic rice lines  
471 with variable Rieske FeS protein content in the cytochrome b6/f complex. *Plant, Cell  
472 and Environment* **39**, 80–87.
- 473 Yamori W., Kusumi K., Iba K. & Terashima I. (2020) Increased stomatal conductance  
474 induces rapid changes to photosynthetic rate in response to naturally fluctuating light  
475 conditions in rice. *Plant, Cell & Environment* **43**, 1230–1240.
- 476 Yamori W., Makino A. & Shikanai T. (2016b) A physiological role of cyclic electron  
477 transport around photosystem I in sustaining photosynthesis under fluctuating light in  
478 rice. *Scientific reports* **6**, 20147.
- 479 Yamori W., Nagai T. & Makino A. (2011) The rate-limiting step for CO<sub>2</sub> assimilation at  
480 different temperatures is influenced by the leaf nitrogen content in several C<sub>3</sub> crop  
481 species. *Plant, Cell and Environment* **34**, 764–777.
- 482 Yamori W., Noguchi K., Hikosaka K. & Terashima I. (2010b) Phenotypic plasticity in  
483 photosynthetic temperature acclimation among crop species with different cold  
484 tolerances. *Plant Physiology* **152**, 388–399.
- 485 Yang Y.-J., Hu H. & Huang W. (2020) The Light Dependence of Mesophyll Conductance  
486 and Relative Limitations on Photosynthesis in Evergreen Sclerophyllous Rhododendron  
487 Species. *Plants* **9**, 1536.
- 488 Yang Y.-J., Tong Y.-G., Yu G.-Y., Zhang S.-B. & Huang W. (2018a) Photosynthetic  
489 characteristics explain the high growth rate for *Eucalyptus camaldulensis*: Implications  
490 for breeding strategy. *Industrial Crops and Products* **124**, 186–191.
- 491 Yang Z.-H., Huang W., Yang Q.-Y., Chang W. & Zhang S.-B. (2018b) Anatomical and  
492 diffusional determinants inside leaves explain the difference in photosynthetic capacity  
493 between *Cypripedium* and *Paphiopedilum*, Orchidaceae. *Photosynthesis Research* **136**,  
494 315–328.
- 495 Zhang Y., Kaiser E., Marcelis L.F.M., Yang Q. & Li T. (2020) Salt stress and fluctuating  
496 light have separate effects on photosynthetic acclimation, but interactively affect

497 biomass. *Plant, Cell & Environment* **43**, 2192–2206.

498

499

500

501

502 **Table 1.** Physiological characteristics of leaves from plants grown under three different  
503 nutrient concentrations (low, medium and high nitrogen). All parameters were measured at  
504 1500  $\mu\text{mol photons m}^{-2} \text{s}^{-1}$  and 400  $\mu\text{mol mol}^{-1}$  CO<sub>2</sub> concentration. Values are means  $\pm$  SE (n

|                                                | Low N                     | Medium N                 | High N                  |
|------------------------------------------------|---------------------------|--------------------------|-------------------------|
| Leaf N content ( $\text{g m}^{-2}$ )           | $0.42 \pm 0.03\text{a}$   | $0.71 \pm 0.3\text{b}$   | $1.2 \pm 0.07\text{c}$  |
| SPAD value                                     | $29.2 \pm 1.2\text{a}$    | $40.2 \pm 1.7\text{b}$   | $50.1 \pm 1.7\text{c}$  |
| $A_N$ ( $\mu\text{mol m}^{-2} \text{s}^{-1}$ ) | $5.9 \pm 0.3\text{a}$     | $10.2 \pm 0.29\text{b}$  | $19.1 \pm 0.67\text{c}$ |
| $g_s$ ( $\text{mol m}^{-2} \text{s}^{-1}$ )    | $0.22 \pm 0.02\text{a}$   | $0.25 \pm 0.01\text{a}$  | $0.31 \pm 0.01\text{b}$ |
| $g_m$ ( $\text{mol m}^{-2} \text{s}^{-1}$ )    | $0.045 \pm 0.002\text{a}$ | $0.09 \pm 0.007\text{b}$ | $0.19 \pm 0.01\text{c}$ |
| ETR ( $\mu\text{mol m}^{-2} \text{s}^{-1}$ )   | $44 \pm 2.7\text{c}$      | $80 \pm 2.0\text{b}$     | $156 \pm 3.9\text{a}$   |

505 = 5).

506

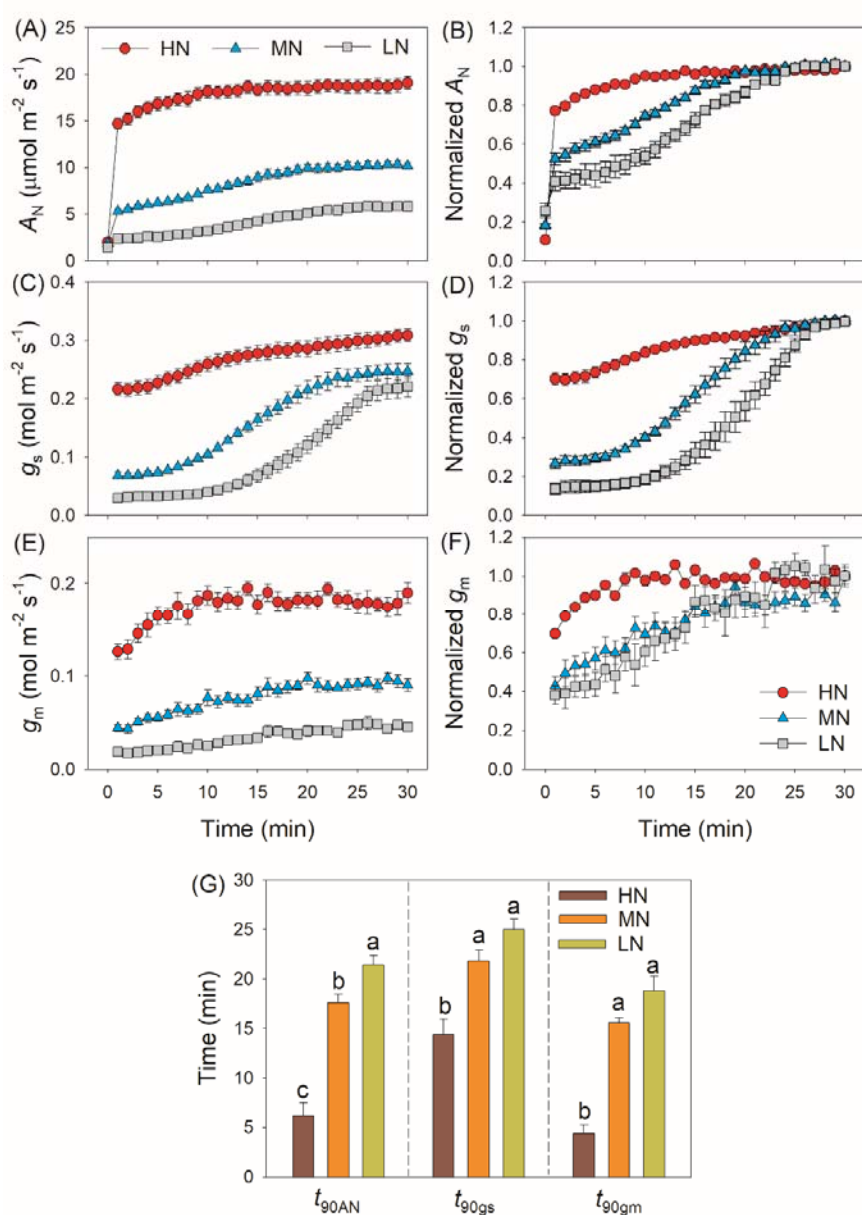

**Figure 1.** Induction response of net CO<sub>2</sub> assimilation rate ( $A_N$ ), stomatal conductance ( $g_s$ ) and mesophyll conductance ( $g_m$ ), and the time required to reach 90% of the maximum values of  $A_N$ ,  $g_s$  and  $g_m$  ( $t_{90AN}$ ,  $t_{90gs}$ ,  $t_{90gm}$ ) after transition from 50 to 1500  $\mu\text{mol photons m}^{-2} \text{s}^{-1}$ .  $A_N$ ,  $g_s$  and  $g_m$  were measured every 1 min. Values are means  $\pm$  SE ( $n = 5$ ). Different letters indicate significant differences among different treatments. The relative  $A_N$ ,  $g_s$  and  $g_m$  curves were obtained from the standardization against the maximum values after 30 min photosynthetic induction at high light. HN, MN and LN represent tomato plants grown under high, medium and low N concentrations, respectively.

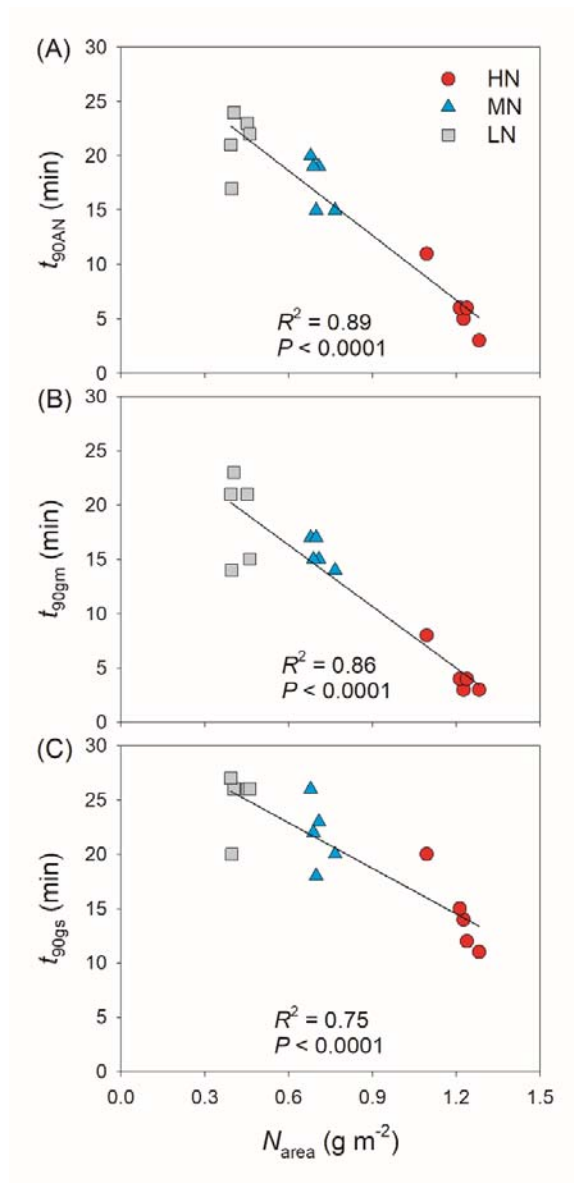

**Figure 2.** Effects of leaf N content on the time required to reach 90% of the maximum values of  $A_N$ ,  $g_s$  and  $g_m$  ( $t_{90AN}$ ,  $t_{90gs}$ ,  $t_{90gm}$ ) after transition from 50 to 1500  $\mu\text{mol photons m}^{-2} \text{s}^{-1}$ . HN, MN and LN represent tomato plants grown under high, medium and low N concentrations, respectively.

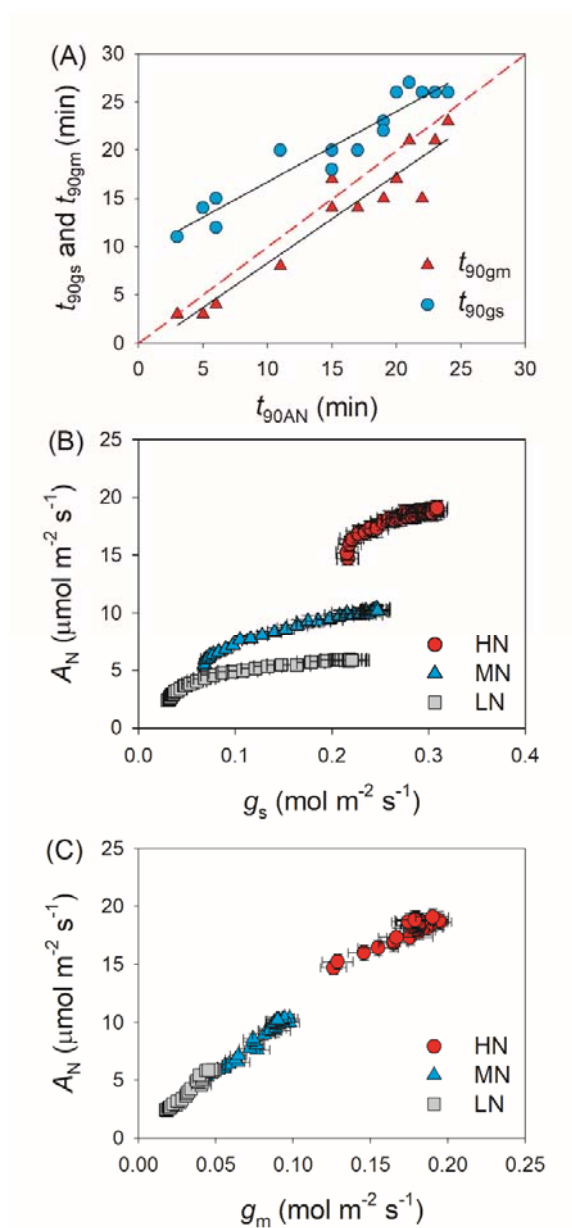

**Figure 3.** (A) Relationships between  $t_{90AN}$ ,  $t_{90gs}$  and  $t_{90gm}$  after transition from 50 to 1500  $\mu\text{mol photons m}^{-2} \text{s}^{-1}$ . (B and C) Relationships between  $g_s$ ,  $g_m$  and  $A_N$  after transition from 50 to 1500  $\mu\text{mol photons m}^{-2} \text{s}^{-1}$ . Values are means  $\pm$  SE ( $n = 5$ ). HN, MN and LN represent tomato plants grown under high, medium and low N concentrations, respectively.

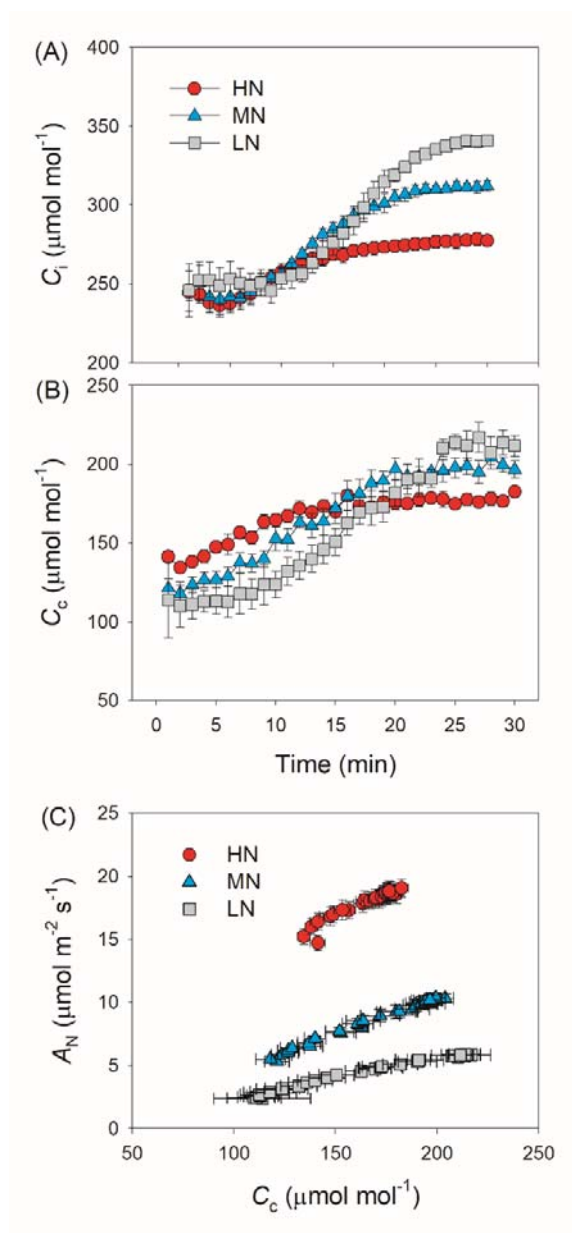

**Figure 4.** (A and B) Response of intercellular  $\text{CO}_2$  concentration ( $C_i$ ) and chloroplast  $\text{CO}_2$  concentration ( $C_c$ ) after transition from 50 to 1500  $\mu\text{mol photons m}^{-2} \text{s}^{-1}$ . (C) Relationship between  $C_c$  and  $A_N$  after transition from 50 to 1500  $\mu\text{mol photons m}^{-2} \text{s}^{-1}$ . Values are means  $\pm$  SE (n = 5). HN, MN and LN represent tomato plants grown under high, medium and low N concentrations, respectively.



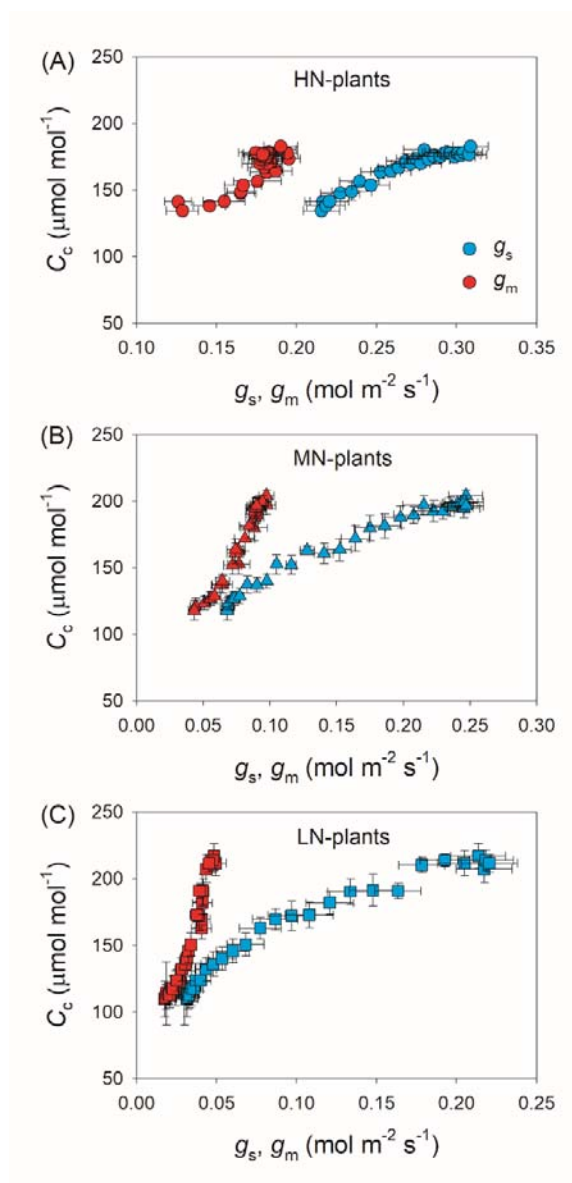

**Figure 5.** Relationships between  $g_s$ ,  $g_m$  and  $C_c$  after transition from 50 to 1500  $\mu\text{mol photons m}^{-2} \text{s}^{-1}$ . Values are means  $\pm$  SE ( $n = 5$ ). HN, MN and LN represent tomato plants grown under high, medium and low N concentrations, respectively.

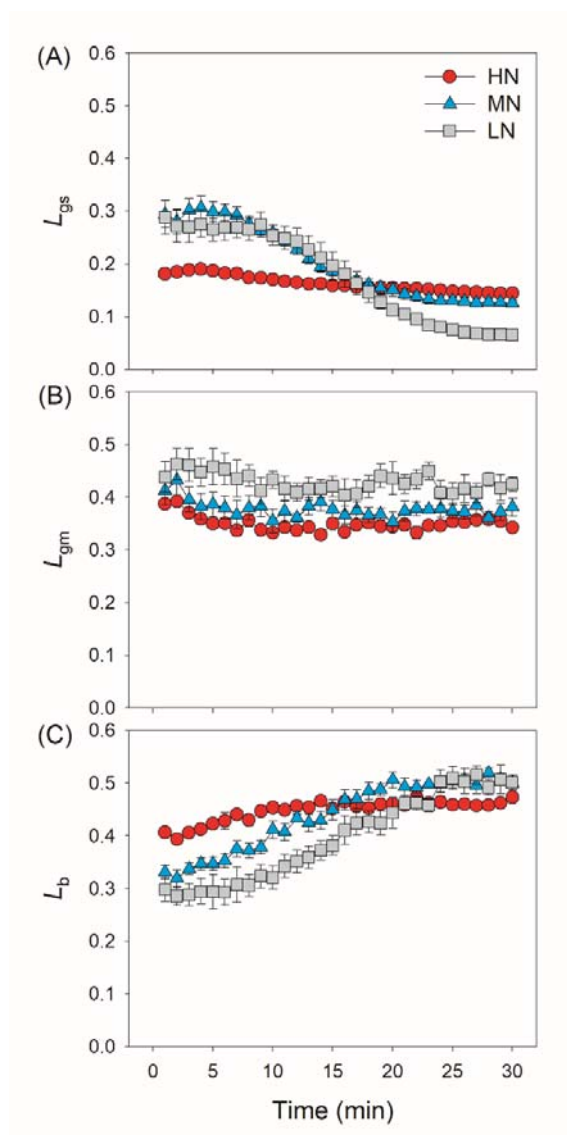

**Figure 6.** Quantitative analysis of the relative limitations of  $g_s$ ,  $g_m$  and biochemical factors imposed to photosynthesis after transition from 50 to 1500  $\mu\text{mol photons m}^{-2} \text{s}^{-1}$ . Values are means  $\pm$  SE (n = 5). HN, MN and LN represent tomato plants grown under high, medium and low N concentrations, respectively.

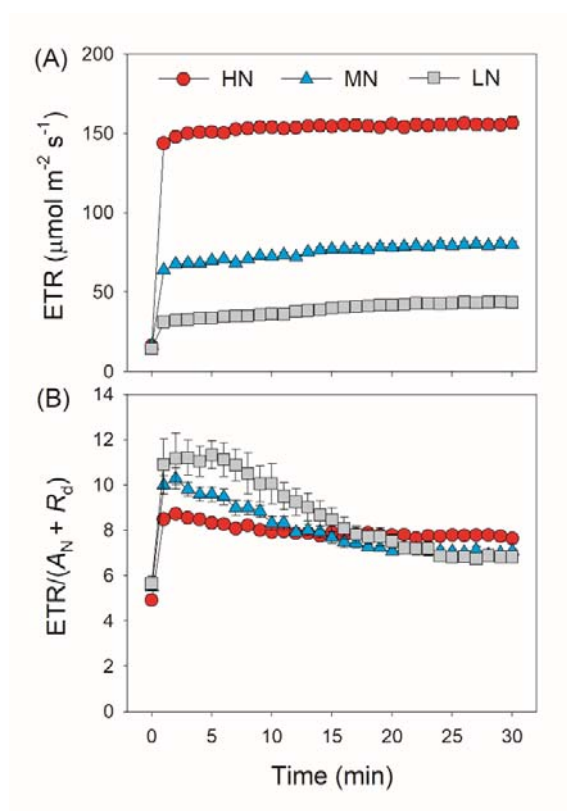

**Figure 7.** Response of electron transport rate (ETR) and the ratio of ETR to ( $A_N + R_d$ ) after transition from 50 to 1500  $\mu\text{mol photons m}^{-2} \text{s}^{-1}$ . Values are means  $\pm$  SE ( $n = 5$ ). HN, MN and LN represent tomato plants grown under high, medium and low N concentrations, respectively.
